# Supplementary material for: Single-Cell Cytokine Gene Expression in Peripheral Blood Cells Correlates with Latent Tuberculosis Status
Source: PubMed Central journal article supplement (PMC4681842; doi:10.1371/journal.pone.0144904), 2015-12-14
Supplement: pone.0144904.s005.pdf [file pone.0144904.s005.pdf]

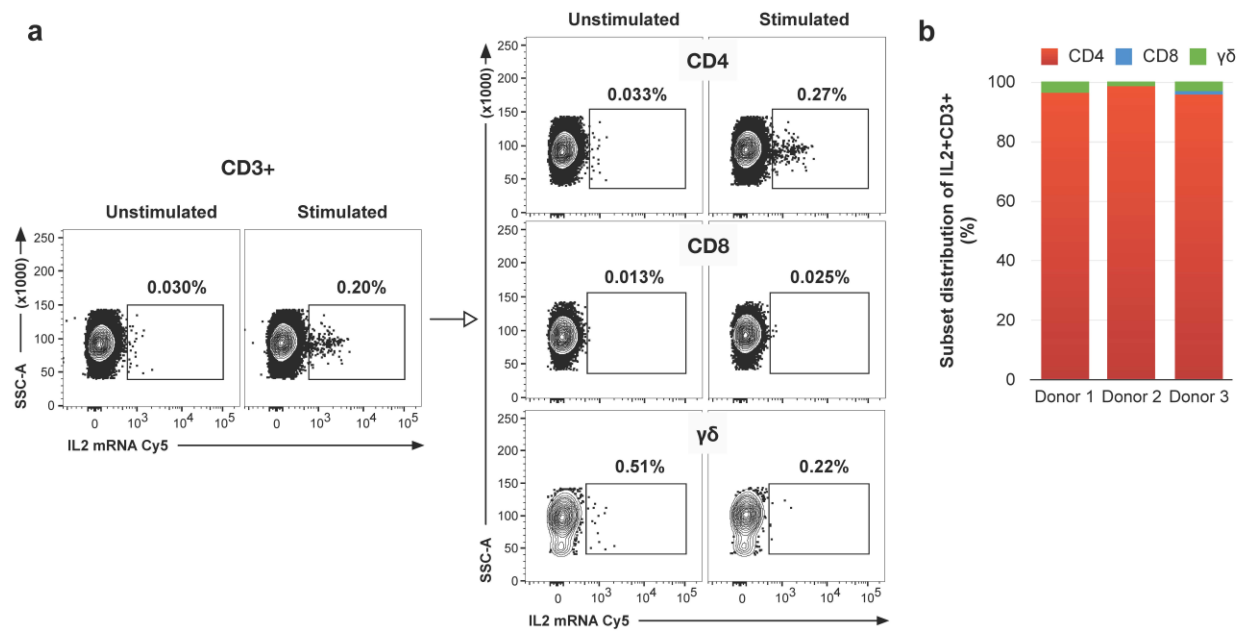

**S5 Fig. Analysis of IL2 expression in CD3+ subsets.**
